# Supplementary material
Source: PubMed Central journal article supplement (PMC5018040)

S1

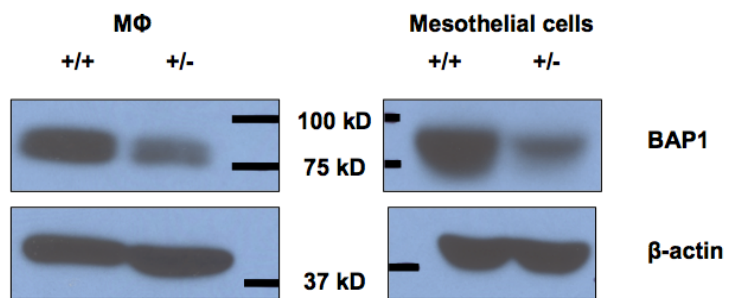

Supplement: NIHMS744439-supplement-Supplement_1.pdf [file NIHMS744439-supplement-Supplement_1.pdf]

A.

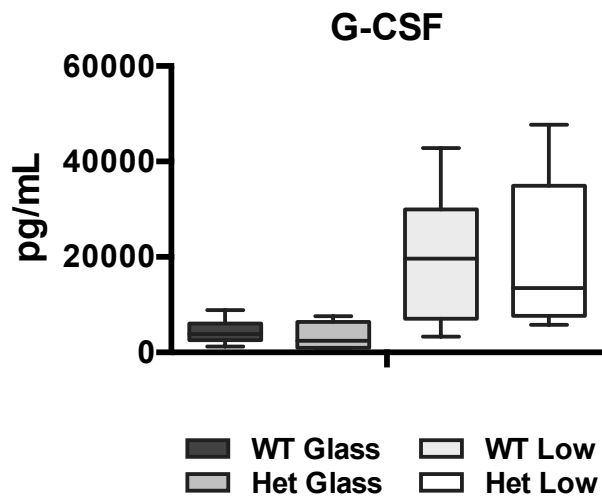

B.

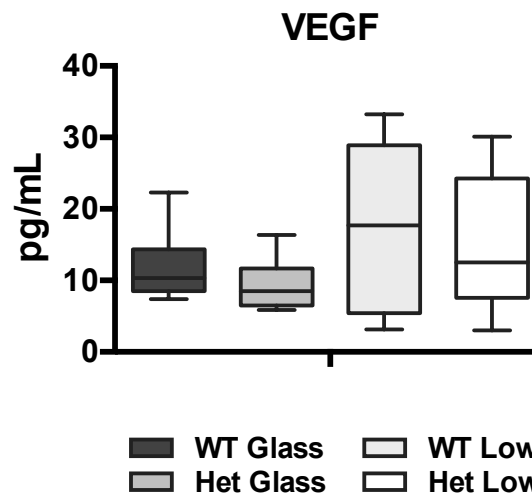

C.

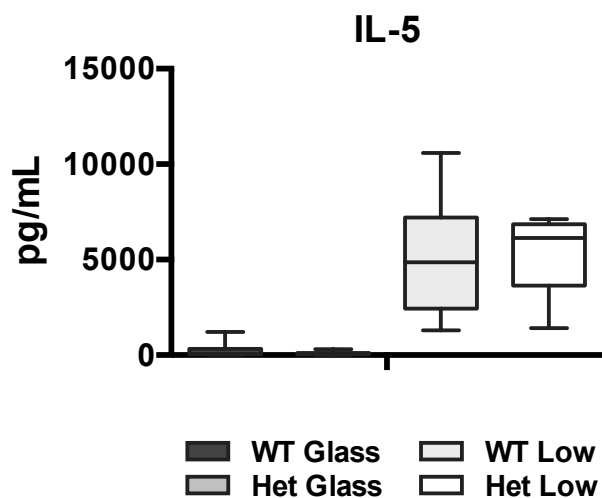

D.

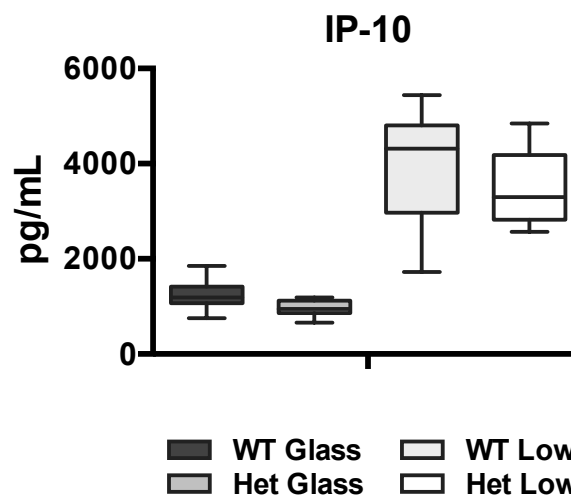

Supplement: NIHMS744439-supplement-Supplement_2A-D.pdf [file NIHMS744439-supplement-Supplement_2A-D.pdf]
